# Supplementary material for: Rehospitalizations among Patients in the Medicare Fee-for-Service Program
Source: Atypon-hosted journal article supplement (doi:10.1056/nejmsa0803563), 2009-04-01
Supplement: nejm_jencks_1418sa1.pdf [file nejm_jencks_1418sa1.pdf]

## Supplementary Appendix

This appendix has been provided by the authors to give readers additional information about their work.

Supplement to: Jencks SF, Williams MV, Coleman EA. Rehospitalizations among patients in the Medicare fee-for-service program. *N Engl J Med* 2009;360:1418-28.

## APPENDIX

Our objective was to identify DRGs for which an important fraction of 30-day rehospitalizations were “planned” (that is, occurred by choice rather than because of clinical deterioration). The plan may reflect an elective hospitalization unrelated to the index hospitalization, a hospitalization to complete care that could not be completed efficiently within a single hospitalization, or a hospitalization deliberately separated from the original hospitalization to maximize revenue (gaming).

In general, unplanned rehospitalization is most frequent in the first day or two after the last discharge and becomes less frequent with the passage of time. We hypothesized that rehospitalizations resulting from clinical deterioration (e.g.: heart failure, pneumonia, sepsis, etc), would decrease exponentially with time after discharge in a DRG-specific way:

$$(1) \quad \text{rehospitalization rate}_{t, \text{DRG}} = \text{baseline}_{\text{DRG}} + b_{\text{DRG}} \cdot e^{-k_{\text{DRG}} t}.$$

For computational purposes, we restate equation (1) as

$$(2) \quad \log(\text{rehospitalization rate}_{t, \text{DRG}} - \text{baseline}_{\text{DRG}}) = b_{\text{DRG}} + k_{\text{DRG}} t.$$

Rehospitalizations<sub>t, DRG</sub> is the number of hospitalizations assigned to that DRG that occurred exactly t days after a short-stay hospital discharge for any reason.

Baseline<sub>DRG</sub> is the average daily number of rehospitalizations for this DRG between 160 and 200 days after the index hospitalization.

For each of the 100 most frequent rehospitalization DRGs (73.2% of all rehospitalizations) we then estimated  $b_{\text{DRG}}$  and  $k_{\text{DRG}}$ , using ordinary least squares regression, and computed  $R^2$  for the fit of the observational data to the resulting model.

Figure App-1 plots the log of the daily number of rehospitalizations for pneumonia ( $R^2=0.98$   $k=-0.039$  to  $-0.044$ ), renal failure ( $R^2=0.90$ ,  $k=-0.035$  to  $-0.046$ ), peripheral vascular disease with

medical care ( $R^2=0.87$ ,  $k= -.029$  to  $-.040$ ), drug-eluting stent ( $R^2=0.67$ ,  $k= -0.017$  to  $-0.034$ ), and chemotherapy ( $R^2=0.18$ ,  $k= -0.062$  to  $-0.005$ ) against the number of days since the last discharge. Because the number of rehospitalizations is on a logarithmic scale, the relatively straight lines for pneumonia, renal failure, and medical care of peripheral vascular disease represent the exponential decrease in rehospitalizations that we hypothesized and the high  $R^2$ s indicate that the fit is quite good. The fact that the lines are roughly parallel means that rate of decrease in the risk of rehospitalization ( $k$ ) for each of these conditions is similar. By contrast, the frequency of rehospitalizations for placement of a drug-eluting stent has spikes 1, 2, 3, and 4 weeks after discharge, strongly suggesting an element of planning (and leading to a lower  $R^2$ ), and also has a slower rate of decline (perhaps because planned rehospitalizations are mixed with unplanned rehospitalizations). Finally, rehospitalization for chemotherapy actually becomes more frequent with longer time from discharge and the  $R^2$  is quite low, so planning is still more likely.

Table App-1 shows the 100 most frequent DRGs, the regression coefficient ( $k$ ) for time since last discharge (see equations above),  $R^2$ , and the cumulative percent of the top 100 rehospitalization DRGs. This information provides a semi-quantitative framework for estimating the percentage of rehospitalizations that are planned. Almost all of the DRGs with an  $R^2$  greater than 0.85 or with an estimated  $k$  whose lower confidence limit is greater than -0.35 appear to represent rehospitalizations that would rarely be planned. We have shaded the cells where the title of the DRG, the value of  $R^2$ , or the value of  $k$  suggest that planned rehospitalizations are frequent. From this information we designated 19 DRGs (marked with a ✓), representing 9.4% of discharges in the top 100 DRGs, as “often planned”. We assumed that the same percentage applies to the remaining 380 DRGs, but lower volume of rehospitalizations prevents applying the same statistical methods.

**FIGURE APP-1**  
**FREQUENCY OF HOSPITALIZATION FOR FIVE CONDITIONS**  
**ACCORDING TO DAYS SINCE LAST HOSPITALIZATION FOR ANY REASON**  
**MEDICARE FEE-FOR-SERVICE 10/1/2003-9/30/2004**

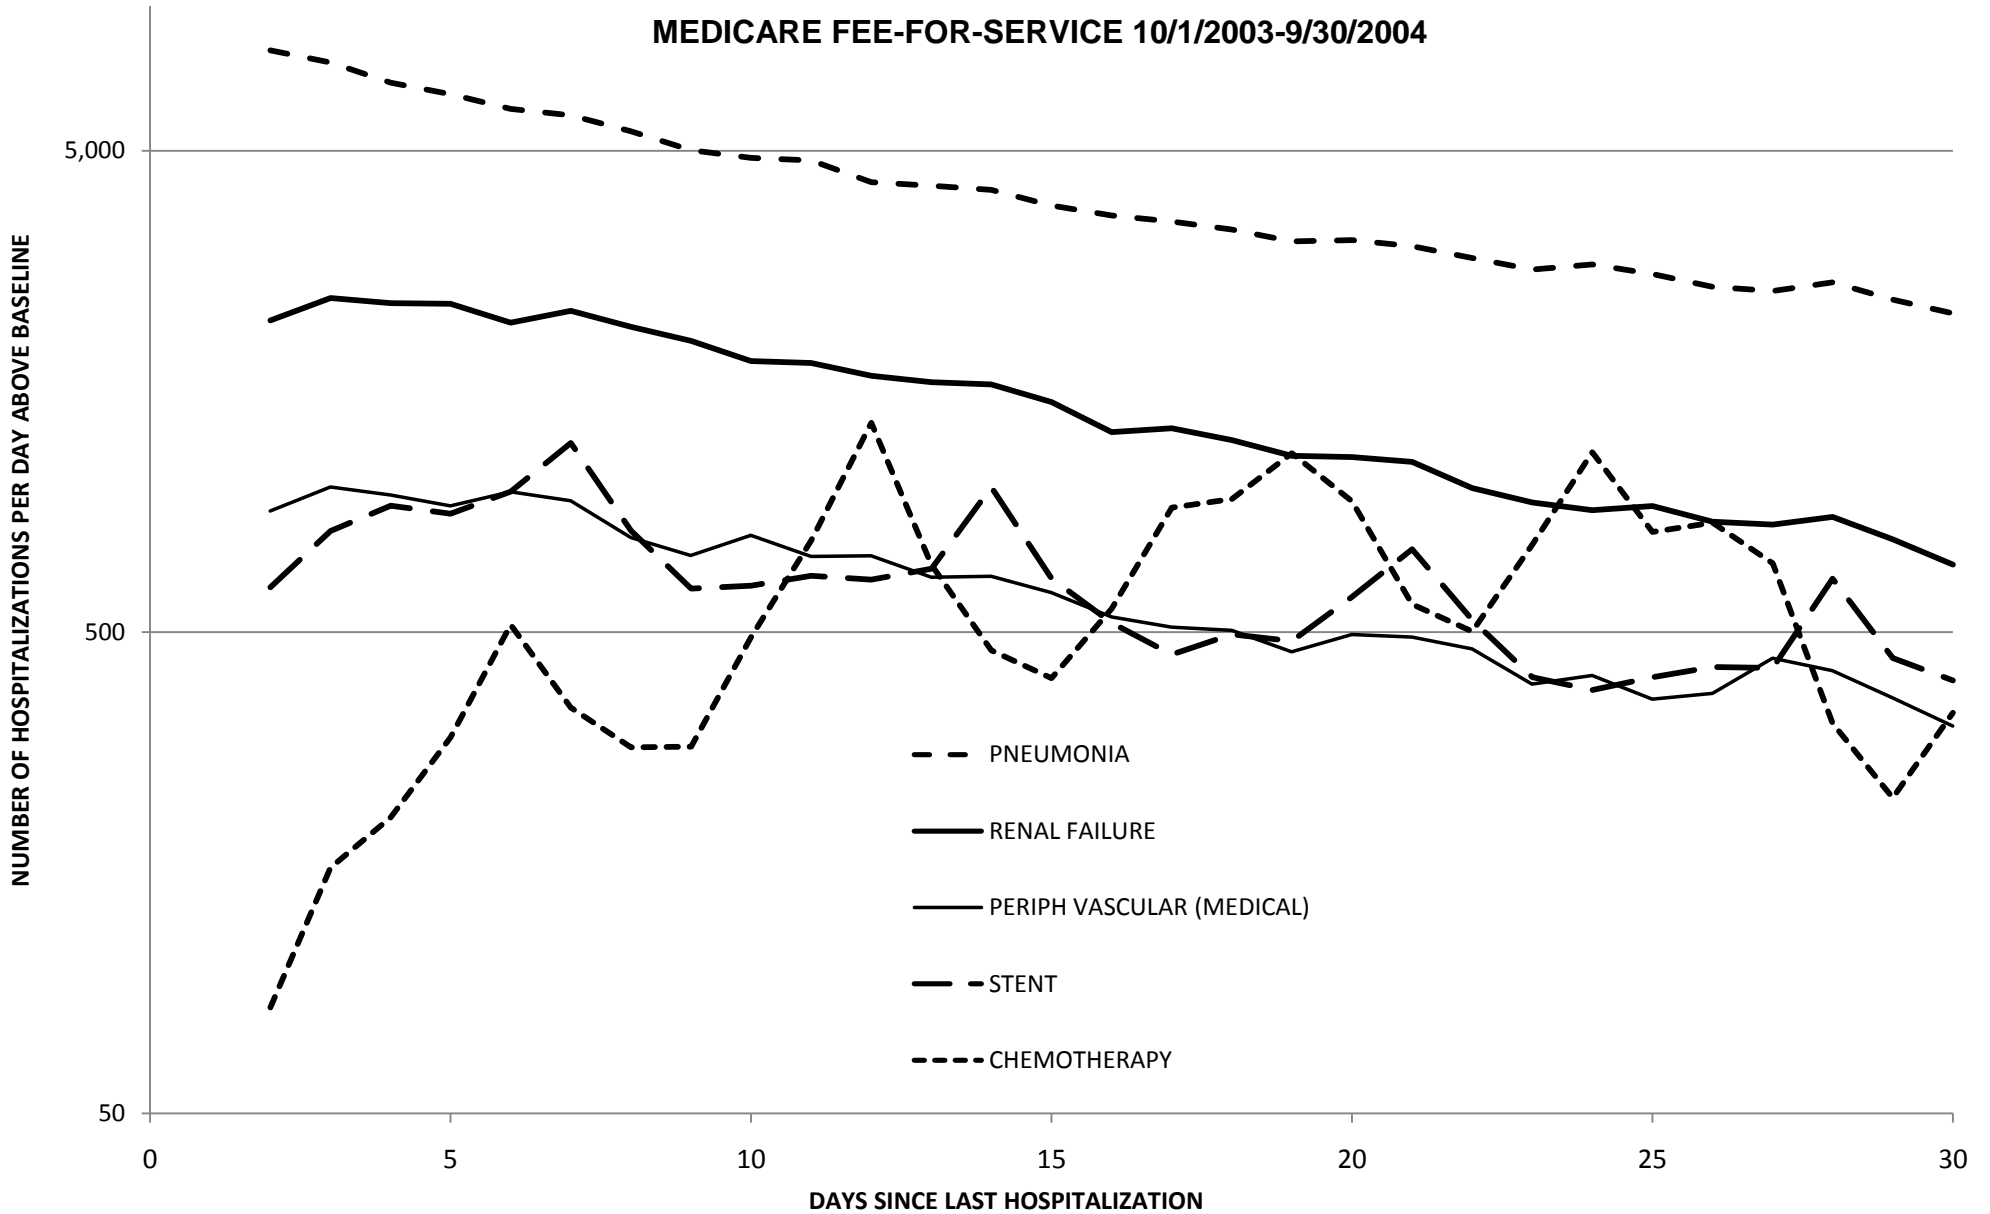

APPENDIX TABLE 1

## REHOSPITALIZATIONS WITHIN 30 DAYS OF HOSPITAL DISCHARGE

| DRG FOR REHOSPITALIZATION                                         | MS | Total Re-hospitalizations | Rate of change over time (k) (95% CI) | RSQ   | Cum Pct of Rehs |
|-------------------------------------------------------------------|----|---------------------------|---------------------------------------|-------|-----------------|
| 127 Heart Failure & Shock                                         | M  | 176,125                   | -0.032 to -0.034                      | 0.990 | 9.4%            |
| 174 G.I. Hemorrhage w CC                                          | M  | 52,353                    | -0.044 to -0.049                      | 0.985 | 12.2%           |
| 078 Pulmonary Embolism                                            | M  | 12,148                    | -0.050 to -0.057                      | 0.978 | 12.9%           |
| 182 Esophagitis, Gastroent & Misc Digest Disorders Age >17 w CC   | M  | 68,367                    | -0.040 to -0.045                      | 0.978 | 16.5%           |
| 076 Other Resp System O.R. Procedures w CC                        | S  | 10,623                    | -0.042 to -0.047                      | 0.977 | 17.1%           |
| 204 Disorders Of Pancreas Except Malignancy                       | M  | 14,333                    | -0.043 to -0.049                      | 0.975 | 17.8%           |
| 143 Chest Pain                                                    | M  | 31,539                    | -0.039 to -0.044                      | 0.975 | 19.5%           |
| 079, 080, 081, 089, 090, 091 Pneumonia & Pulmonary Infections     | M  | 147,185                   | -0.039 to -0.044                      | 0.975 | 27.4%           |
| 087 Pulmonary Edema & Respiratory Failure                         | M  | 21,244                    | -0.038 to -0.043                      | 0.974 | 28.5%           |
| 249 Aftercare, Musculoskeletal System & Connective Tissue         | M  | 7,771                     | -0.046 to -0.052                      | 0.973 | 29.0%           |
| 144 Other Circulatory System Dx w CC                              | M  | 34,352                    | -0.050 to -0.057                      | 0.971 | 30.8%           |
| 132 Atherosclerosis w CC                                          | M  | 20,457                    | -0.040 to -0.046                      | 0.970 | 31.9%           |
| 475 Respiratory System Dx With Ventilator Support                 | S  | 29,409                    | -0.047 to -0.054                      | 0.969 | 33.5%           |
| 452 Complications Of Treatment w CC                               | M  | 11,463                    | -0.079 to -0.091                      | 0.969 | 34.1%           |
| 331 Other Kidney & Urinary Tract Dx Age >17 w CC                  | M  | 15,307                    | -0.044 to -0.051                      | 0.967 | 34.9%           |
| 138 Cardiac Arrhythmia & Conduction Disorders w CC                | M  | 36,608                    | -0.041 to -0.048                      | 0.967 | 36.8%           |
| 099 Respiratory Signs & Symptoms w CC                             | M  | 4,639                     | -0.051 to -0.059                      | 0.965 | 37.1%           |
| 416 Septicemia Age >17                                            | M  | 63,416                    | -0.036 to -0.042                      | 0.964 | 40.5%           |
| 468 Extensive O.R. Procedure Unrelated To Principal Dx            | U  | 10,776                    | -0.040 to -0.046                      | 0.963 | 41.1%           |
| 320 Kidney & Urinary Tract Infections Age >17 w CC                | M  | 42,612                    | -0.025 to -0.030                      | 0.962 | 43.3%           |
| 463 Signs & Symptoms w CC                                         | M  | 9,265                     | -0.048 to -0.056                      | 0.961 | 43.8%           |
| 124 Circulatory Disorders Except Ami, w Card Cath & Complex Dx    | M  | 16,210                    | -0.037 to -0.044                      | 0.957 | 44.7%           |
| 430 Psychoses                                                     | M  | 75,622                    | -0.044 to -0.052                      | 0.957 | 48.7%           |
| 172 Digestive Malignancy w CC                                     | M  | 7,579                     | -0.040 to -0.047                      | 0.955 | 49.1%           |
| 419 Fever Of Unknown Origin Age >17 w CC                          | M  | 4,574                     | -0.051 to -0.061                      | 0.954 | 49.4%           |
| 082 Respiratory Neoplasms                                         | M  | 15,435                    | -0.037 to -0.044                      | 0.953 | 50.2%           |
| 483 No Longer Valid                                               | S  | 8,315                     | -0.050 to -0.059                      | 0.953 | 50.7%           |
| 296 Nutritional & Misc Metabolic Disorders Age >17 w CC           | M  | 65,967                    | -0.038 to -0.045                      | 0.953 | 54.2%           |
| 018 Cranial & Peripheral Nerve Disorders w CC                     | M  | 8,571                     | -0.040 to -0.047                      | 0.950 | 54.6%           |
| 170 Other Digestive System O.R. Procedures w CC                   | S  | 4,930                     | -0.046 to -0.056                      | 0.949 | 54.9%           |
| 180 G.I. Obstruction w CC                                         | M  | 19,639                    | -0.048 to -0.058                      | 0.949 | 56.0%           |
| 442 Other O.R. Procedures For Injuries w CC                       | S  | 5,858                     | -0.060 to -0.072                      | 0.948 | 56.3%           |
| 183 Esophagitis, Gastroent & Misc Digest Disorders Age >17 w/o CC | M  | 10,704                    | -0.043 to -0.052                      | 0.948 | 56.8%           |
| 297 Nutritional & Misc Metabolic Disorders Age >17 w/o CC         | M  | 7,134                     | -0.042 to -0.051                      | 0.947 | 57.2%           |
| 449 Poisoning & Toxic Effects Of Drugs Age >17 w CC               | M  | 8,463                     | -0.042 to -0.050                      | 0.945 | 57.7%           |
| 123 Circulatory Disorders w AMI, Expired                          | M  | 6,792                     | -0.050 to -0.061                      | 0.942 | 58.0%           |
| 088 Chronic Obstructive Pulmonary Disease                         | M  | 73,410                    | -0.022 to -0.027                      | 0.942 | 62.0%           |
| 243 Medical Back Problems                                         | M  | 13,013                    | -0.036 to -0.043                      | 0.942 | 62.7%           |
| 139 Cardiac Arrhythmia & Conduction Disorders w/o CC              | M  | 7,765                     | -0.041 to -0.050                      | 0.940 | 63.1%           |

APPENDIX TABLE 1

REHOSPITALIZATIONS WITHIN 30 DAYS OF HOSPITAL DISCHARGE

|   | DRG FOR REHOSPITALIZATION                                         | MS | Total Re-hospitalizations | Rate of change over time (k) (95% CI) | RSQ   | Cum Pct of Rehs |
|---|-------------------------------------------------------------------|----|---------------------------|---------------------------------------|-------|-----------------|
|   | 294 Diabetes Age >35                                              | M  | 20,680                    | -0.046 to -0.056                      | 0.939 | 64.2%           |
|   | 188 Other Digestive System Dx Age >17 w CC                        | M  | 24,603                    | -0.060 to -0.073                      | 0.938 | 65.5%           |
|   | 207 Disorders Of The Biliary Tract w CC                           | M  | 6,222                     | -0.040 to -0.048                      | 0.938 | 65.8%           |
|   | 101 Other Respiratory System Dx w CC                              | M  | 5,572                     | -0.056 to -0.069                      | 0.935 | 66.1%           |
|   | 523 Alcohol/Drug Abuse Or Dependence w/o Rehab w/o CC             | M  | 5,331                     | -0.046 to -0.056                      | 0.934 | 66.4%           |
|   | 521 Alcohol/Drug Abuse Or Dependence w CC                         | M  | 8,813                     | -0.042 to -0.052                      | 0.933 | 66.9%           |
|   | 015 Nonspecific CVA & Precerebral Occlusion w/o Infarct           | M  | 9,709                     | -0.042 to -0.052                      | 0.931 | 67.4%           |
|   | 085 Pleural Effusion w CC                                         | M  | 7,029                     | -0.041 to -0.051                      | 0.930 | 67.8%           |
|   | 205 Disorders Of Liver Except Malig,Cirr,Alc Hepa w CC            | M  | 10,665                    | -0.042 to -0.052                      | 0.928 | 68.3%           |
|   | 429 Organic Disturbances & Mental Retardation                     | M  | 10,549                    | -0.045 to -0.056                      | 0.925 | 68.9%           |
|   | 125 Circulatory Disorders Except Ami, w Card Cath w/o Complex Dx  | M  | 9,347                     | -0.043 to -0.053                      | 0.925 | 69.4%           |
|   | 121 Circulatory Disorders w Ami & Major Comp, Discharged Alive    | M  | 25,039                    | -0.043 to -0.054                      | 0.923 | 70.7%           |
|   | 014 Intracranial Hemorrhage Or Cerebral Infarction                | M  | 27,322                    | -0.048 to -0.061                      | 0.921 | 72.2%           |
|   | 493 Laparoscopic Cholecystectomy w/o C.D.E. w CC                  | S  | 7,282                     | -0.035 to -0.044                      | 0.921 | 72.6%           |
|   | 148 Major Small & Large Bowel Procedures w CC                     | S  | 18,514                    | -0.040 to -0.050                      | 0.918 | 73.6%           |
|   | 012 Degenerative Nervous System Disorders                         | M  | 13,382                    | -0.044 to -0.055                      | 0.917 | 74.3%           |
|   | 154 Stomach, Esophageal & Duodenal Procedures Age >17 w CC        | S  | 4,695                     | -0.046 to -0.058                      | 0.916 | 74.5%           |
|   | 116 Other Permanent Cardiac Pacemaker Implant                     | S  | 13,555                    | -0.032 to -0.040                      | 0.914 | 75.3%           |
|   | 096 Bronchitis & Asthma Age >17 w CC                              | M  | 7,544                     | -0.025 to -0.032                      | 0.914 | 75.7%           |
|   | 203 Malignancy Of Hepatobiliary System Or Pancreas                | M  | 6,939                     | -0.040 to -0.051                      | 0.913 | 76.0%           |
|   | 300 Endocrine Disorders w CC                                      | M  | 5,034                     | -0.041 to -0.053                      | 0.911 | 76.3%           |
|   | 210 Hip & Femur Procedures Except Major Joint Age >17 w CC        | S  | 10,737                    | -0.021 to -0.026                      | 0.911 | 76.9%           |
|   | 024 Seizure & Headache Age >17 w CC                               | M  | 13,028                    | -0.042 to -0.054                      | 0.906 | 77.6%           |
|   | 418 Postoperative & Post-Traumatic Infections                     | M  | 16,855                    | -0.055 to -0.070                      | 0.906 | 78.5%           |
|   | 034 Other Disorders Of Nervous System w CC                        | M  | 5,462                     | -0.046 to -0.059                      | 0.905 | 78.8%           |
|   | 239 Pathological Fractures & Musculoskeletal & Conn Tiss Malig    | M  | 7,158                     | -0.027 to -0.035                      | 0.901 | 79.2%           |
|   | 141 Syncope & Collapse w CC                                       | M  | 19,300                    | -0.043 to -0.056                      | 0.901 | 80.2%           |
|   | 524 Transient Ischemia                                            | M  | 12,296                    | -0.036 to -0.047                      | 0.897 | 80.8%           |
| ✓ | 120 Other Circulatory System O.R. Procedures                      | S  | 9,195                     | -0.026 to -0.034                      | 0.896 | 81.3%           |
|   | 316 Renal Failure                                                 | M  | 48,827                    | -0.035 to -0.046                      | 0.894 | 83.9%           |
|   | 202 Cirrhosis & Alcoholic Hepatitis                               | M  | 7,173                     | -0.032 to -0.042                      | 0.893 | 84.3%           |
|   | 403 Lymphoma & Non-Acute Leukemia w CC                            | M  | 9,099                     | -0.034 to -0.044                      | 0.889 | 84.8%           |
|   | 130 Peripheral Vascular Disorders w CC                            | M  | 20,951                    | -0.029 to -0.040                      | 0.871 | 85.9%           |
|   | 122 Circulatory Disorders w Ami w/o Major Comp, Discharged Alive  | M  | 4,937                     | -0.045 to -0.061                      | 0.863 | 86.2%           |
|   | 134 Hypertension                                                  | M  | 4,540                     | -0.033 to -0.046                      | 0.862 | 86.4%           |
| ✓ | 518 Percutaneous Cardiovasc Proc w/o Coronary Artery Stent Or AMI | S  | 6,106                     | -0.031 to -0.042                      | 0.861 | 86.8%           |
|   | 142 Syncope & Collapse w/o CC                                     | M  | 4,366                     | -0.036 to -0.052                      | 0.831 | 87.0%           |
|   | 395 Red Blood Cell Disorders Age >17                              | M  | 27,027                    | -0.019 to -0.028                      | 0.828 | 88.4%           |
| ✓ | 110 Major Cardiovascular Procedures w CC                          | S  | 7,493                     | -0.033 to -0.047                      | 0.827 | 88.8%           |
|   | 398 Reticuloendothelial & Immunity Disorders w CC                 | M  | 5,533                     | -0.037 to -0.054                      | 0.816 | 89.1%           |
| ✓ | 466 Aftercare w/o History Of Malignancy As Secondary Dx           | M  | 7,326                     | -0.052 to -0.076                      | 0.810 | 89.5%           |

APPENDIX TABLE 1

REHOSPITALIZATIONS WITHIN 30 DAYS OF HOSPITAL DISCHARGE

|   | DRG FOR REHOSPITALIZATION                                             | MS | Total Re-hospitalizations | Rate of change over time (k) (95% CI) | RSQ   | Cum Pct of Rehs |
|---|-----------------------------------------------------------------------|----|---------------------------|---------------------------------------|-------|-----------------|
|   | 277 Cellulitis Age >17 w CC                                           | M  | 16,973                    | -0.016 to -0.023                      | 0.809 | 90.4%           |
|   | 397 Coagulation Disorders                                             | M  | 5,326                     | -0.028 to -0.042                      | 0.804 | 90.7%           |
| ✓ | 001 Craniotomy Age >17 w CC                                           | S  | 4,242                     | -0.035 to -0.053                      | 0.782 | 91.0%           |
| ✓ | 478 Other Vascular Procedures w CC                                    | S  | 23,688                    | -0.022 to -0.034                      | 0.780 | 92.2%           |
|   | 236 Fractures Of Hip & Pelvis                                         | M  | 5,178                     | -0.021 to -0.032                      | 0.777 | 92.5%           |
|   | 415 O.R. Procedure For Infectious & Parasitic Diseases                | S  | 18,406                    | -0.028 to -0.043                      | 0.767 | 93.5%           |
| ✓ | 517 Percutaneous Cardiovascular Proc w Non-Drug Eluting Stent w/o AMI | S  | 7,924                     | -0.029 to -0.045                      | 0.756 | 93.9%           |
| ✓ | 109 Coronary Bypass w/o Cardiac Cath                                  | S  | 7,663                     | -0.042 to -0.068                      | 0.726 | 94.3%           |
| ✓ | 515 Cardiac Defibrillator Implant w/o Cardiac Cath                    | S  | 4,492                     | -0.018 to -0.032                      | 0.652 | 94.6%           |
| ✓ | 105 Cardiac Valve&Other Major Cardiothoracic Proc w/o Cardiac Cath    | S  | 5,400                     | -0.023 to -0.046                      | 0.580 | 94.8%           |
| ✓ | 527 Percutaneous Cardiovascular Proc w Drug-Eluting Stent w/o Ami     | S  | 21,607                    | -0.017 to -0.034                      | 0.575 | 96.0%           |
| ✓ | 209 Major Joint & Limb Reattachment Procedures Of Lower Extremity     | S  | 15,106                    | -0.009 to -0.019                      | 0.554 | 96.8%           |
| ✓ | 315 Other Kidney & Urinary Tract Procedures                           | S  | 7,416                     | -0.012 to -0.027                      | 0.510 | 97.2%           |
|   | 271 Skin Ulcers                                                       | M  | 4,267                     | -0.008 to -0.019                      | 0.475 | 97.4%           |
| ✓ | 075 Major Chest Procedures                                            | S  | 5,669                     | -0.010 to -0.024                      | 0.449 | 97.7%           |
| ✓ | 113 Amputation For Circ System Disorders Except Upper Limb & Toe      | S  | 10,859                    | -0.006 to -0.022                      | 0.299 | 98.3%           |
| ✓ | 336 Transurethral Prostatectomy w CC                                  | S  | 4,371                     | -0.004 to -0.023                      | 0.231 | 98.5%           |
| ✓ | 410 Chemotherapy w/o Acute Leukemia As Secondary Dx                   | M  | 17,363                    | 0.062 to 0.005                        | 0.173 | 99.5%           |
| ✓ | 533 Extracranial Procedures w CC                                      | S  | 5,373                     | 0.002 to -0.014                       | 0.085 | 99.8%           |
| ✓ | 263 Skin Graft &/Or Debrid For Skn Ulcer Or Cellulitis w CC           | S  | 4,477                     | 0.009 to -0.008                       | 0.000 | 100.0%          |

✓ indicates DRG judged to have frequent planned admissions

MS indicates whether DRG is medical (M) or surgical (S)

RSQ is the R-Square statistic for how well the observed distribution fits the model

Cum Pct of Rehs is the cumulative percent of 30-day rehospitalizations in the 100 DRGs accounting for most of rehospitalizations.

Cells with grey background were considered important in deciding that a DRG probably included a substantial number of planned rehospitalizations.
